# Supplementary material for: Assessing Methods for Assigning SNPs to Genes in Gene-Based Tests of Association Using Common Variants
Source: PubMed Central journal article supplement (PMC3669368; doi:10.1371/journal.pone.0062161), 2013-05-31

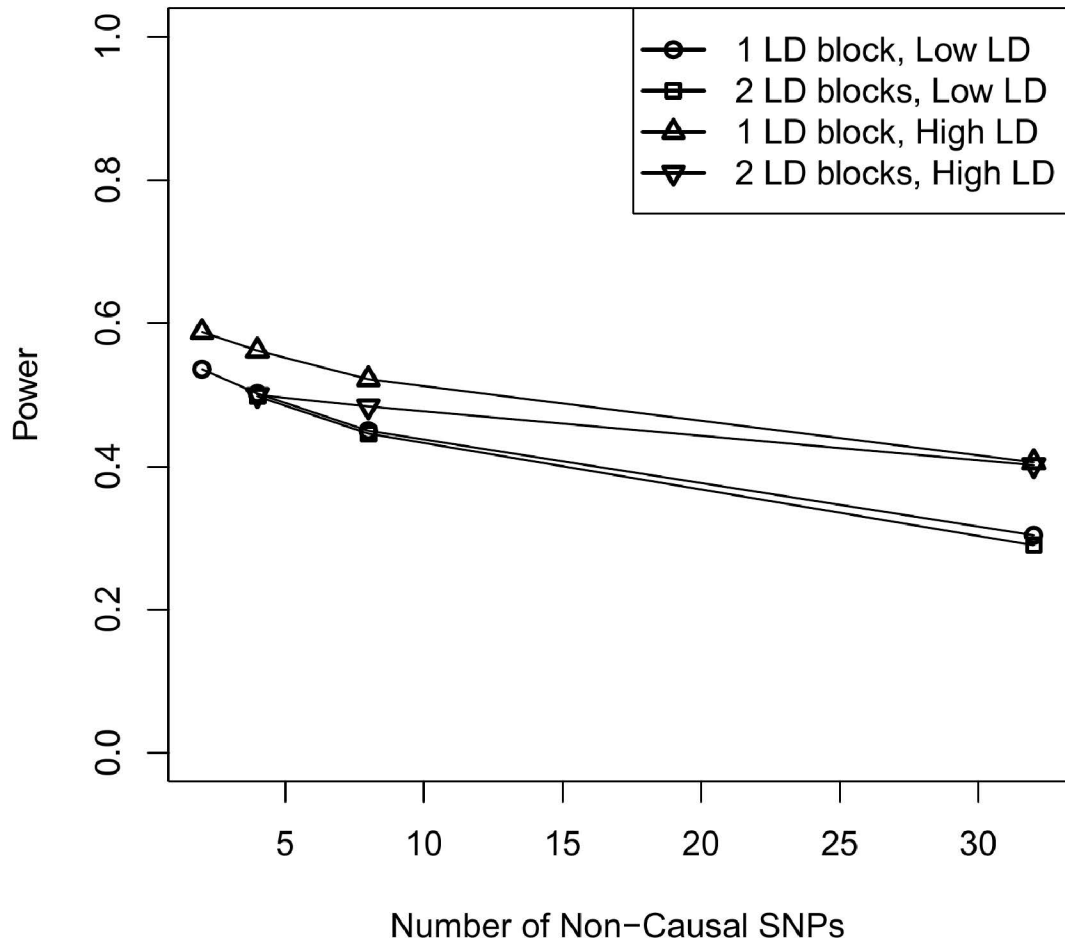

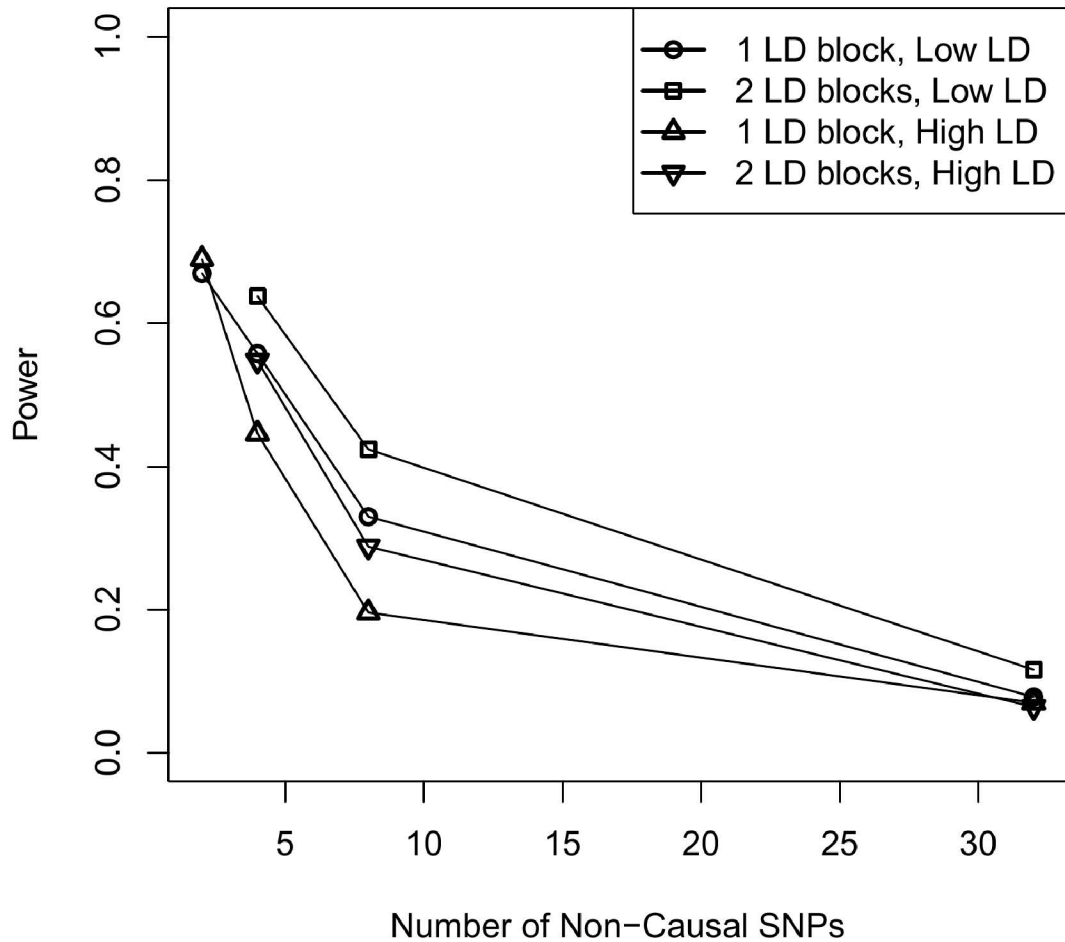

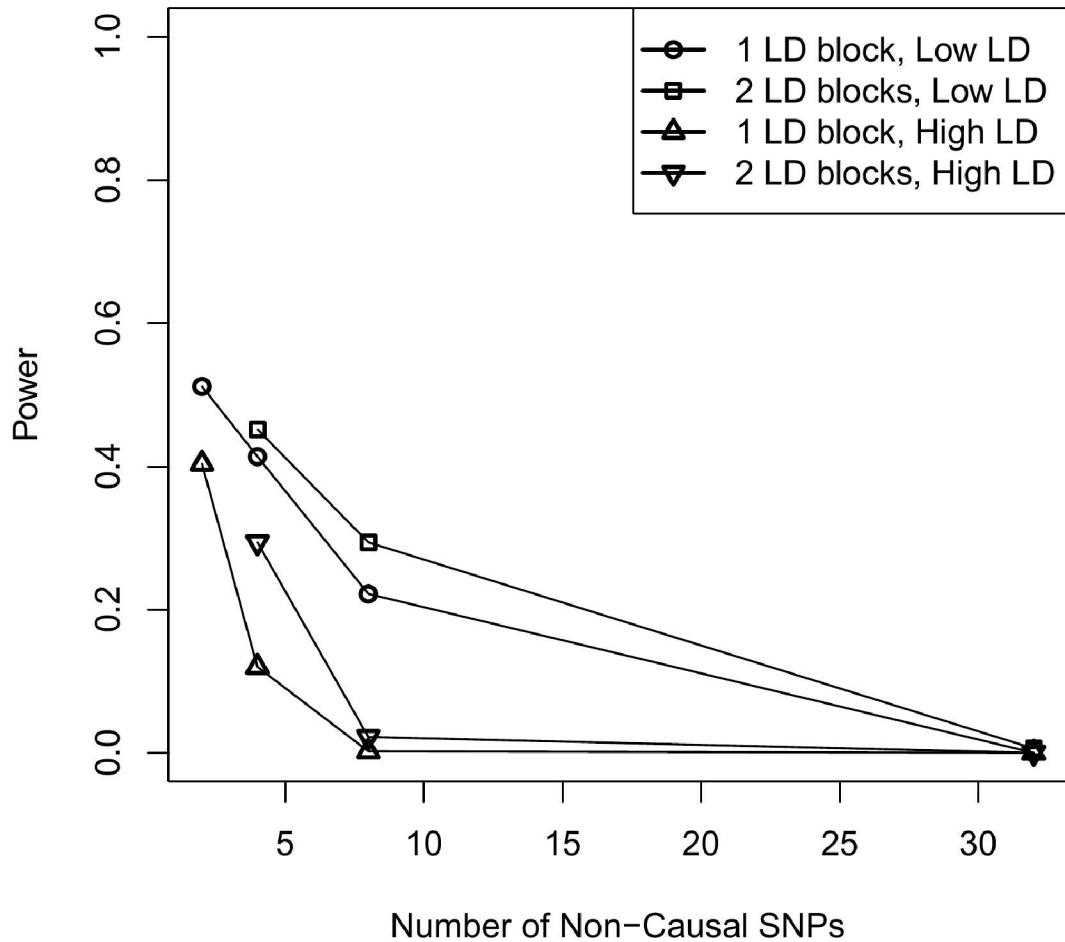

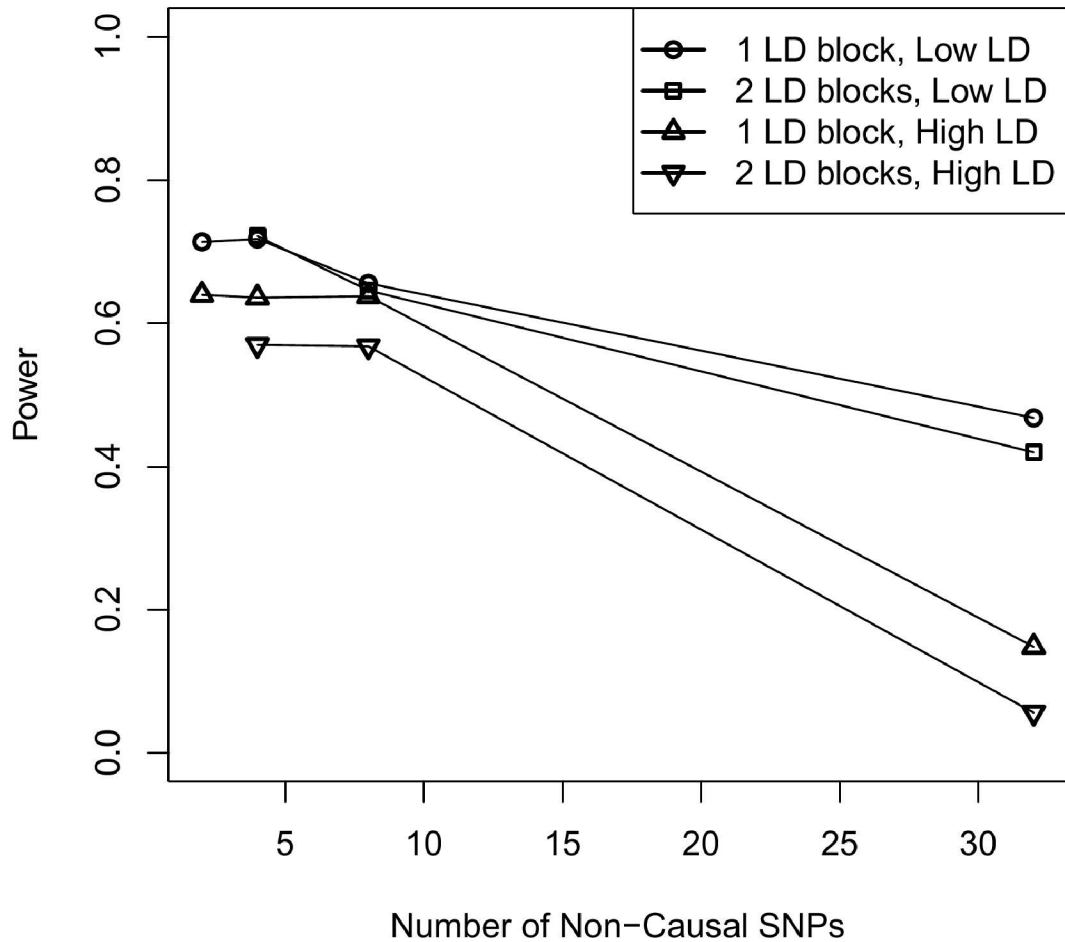

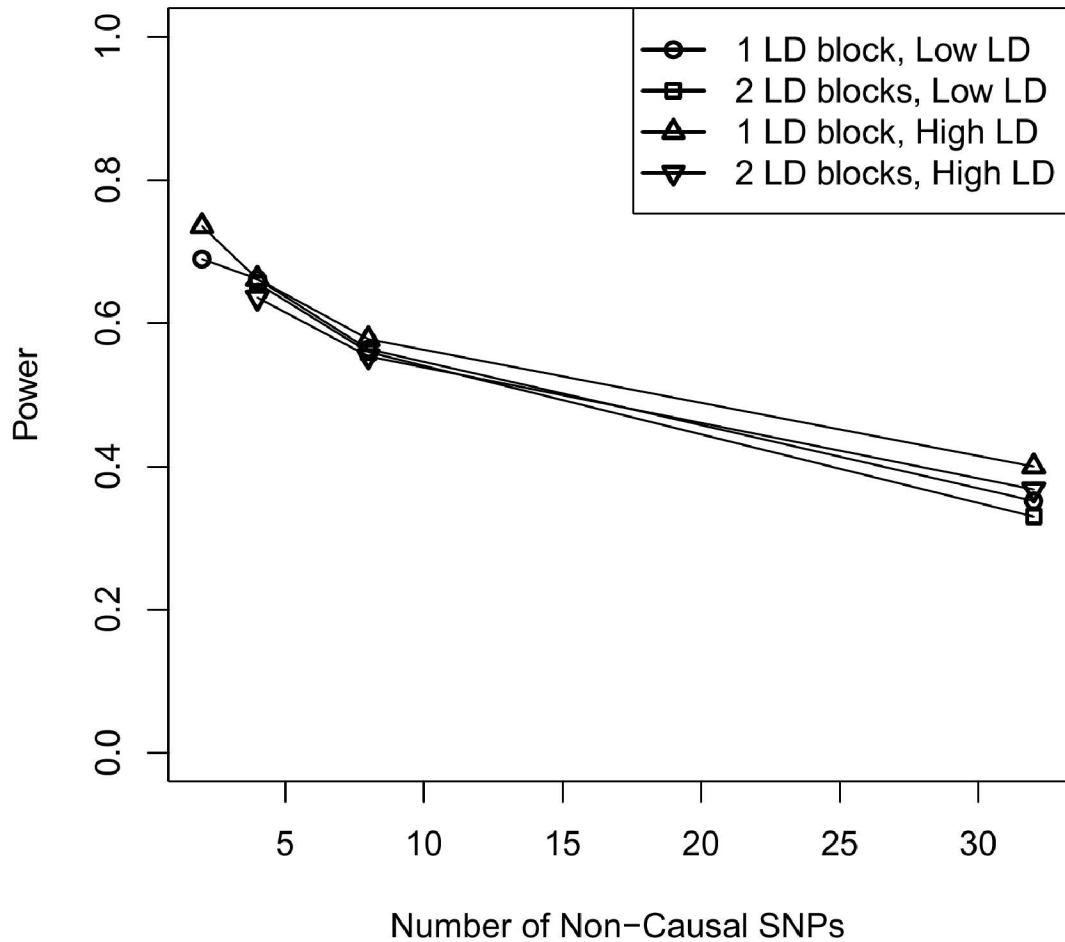

Supplement: pone.0062161.s001.pdf [file pone.0062161.s001.pdf]
